# Supplementary material
Source: PubMed Central journal article supplement (PMC7396853)
Supplement: MDC3-7-723-s002.pdf [file MDC3-7-723-s002.pdf]

## Supplementary material 2: Episodic Ataxia type 1 papers

Browne DL, Gancher ST, Nutt JG, Brunt ER, Smith EA, Kramer P, et al. Episodic ataxia/myokymia syndrome is associated with point mutations in the human potassium channel gene, KCNA1. *Nat Genet.* 1994 Oct;8(2):136–40.

Browne DL, Brunt ERP, Griggs RC, Nutt JG, Gancher ST, Smith EA, et al. Identification of two new KCNA1 mutations in episodic ataxia/myokymia families. *Hum Mol Genet.* 1995 Sep 1;4(9):1671–2.

Çomu S, Giuliani M, Narayanan V. Episodic ataxia and myokymia syndrome: A new mutation of potassium channel gene Kv1.1. *Ann Neurol.* 1996;40:684–687.

Zuberi SM, Eunson LH, Spauschus A, De Silva R, Tolmie J, Wood NW, et al. A novel mutation in the human voltage-gated potassium channel gene (Kv1.1) associates with episodic ataxia type 1 and sometimes with partial epilepsy. *Brain.* 1999 May 1;122(5):817–25.

Eunson LH, Rea R, Zuberi SM, Youroukos S, Panayiotopoulos CP, Liguori R, et al. Clinical, genetic, and expression studies of mutations in the potassium channel gene KCNA1 reveal new phenotypic variability. *Ann Neurol.* 2000 Oct 1;48(4):647–56.

Kinali M, Jungbluth H, Eunson LH, Sewry CA, Manzur AY, Mercuri E, et al. Expanding the phenotype of potassium channelopathy: severe neuromyotonia and skeletal deformities without prominent Episodic Ataxia. *Neuromuscular Disorders.* 2004 Oct 1;14(10):689–93.

Klein A, Boltshauser E, Jen J, Baloh RW. Episodic ataxia type 1 with distal weakness: A novel manifestation of a potassium channelopathy. *Neuropediatrics.* 2004;35:147–149.

Lee H, Wang H, Jen JC, Sabatti C, Baloh RW, Nelson SF. A novel mutation in KCNA1 causes episodic ataxia without myokymia. *Hum Mutat.* 2004 Dec 1;24(6):536–536.

Poujois A, Antoine J-C, Combes A, Touraine RL. Chronic neuromyotonia as a phenotypic variation associated with a new mutation in the KCNA1 gene. *J Neurol.* 2006 Jul 1;253(7):957–9.

Imbrici P, Gualandi F, D'Adamo MC, et al. A novel KCNA1 mutation identified in an Italian family affected by episodic ataxia type 1. *Neuroscience. IBRO;* 2008;157:577–587.

Shook SJ, Mamsa H, Jen JC, Baloh RW, Zhou L. Novel mutation in KCNA1 causes episodic ataxia with paroxysmal dyspnea. *Muscle Nerve.* 2008 Mar 1;37(3):399–402.

Rajakulendran S, Tan SV, Matthews E, Tomlinson SE, Labrum R, Sud R, et al. A Patient with Episodic Ataxia and Paramyotonia Congenita Due to Mutations in Kcna1 and Scn4a. *Neurology*. 2009 Sep 22;73(12):993–5.

Graves TD, Rajakulendran S, Zuberi SM, et al. Nongenetic factors influence severity of episodic ataxia type 1 in monozygotic twins. *Neurology*. 2010;75:367–372.

Tomlinson SE, Rajakulendran S, Tan SV, et al. Clinical, genetic, neurophysiological and functional study of new mutations in episodic ataxia type 1. *J Neurol Neurosurg Psychiatry* 2013;84:1107–1112.

Lassche S, Lainez S, Bloem BR, van de Warrenburg BPC, Hofmeijer J, Lemmink HH, et al. A novel KCNA1 mutation causing episodic ataxia type I. *Muscle Nerve*. 2014 Aug 1;50(2):289–91.

D'Adamo MC, Gallenmüller C, Servettini I, et al. Novel phenotype associated with a mutation in the KCNA1(Kv1.1) gene. *Front Physiol*. 2015 Jan 15; (5):525.

Tacik P, Guthrie KJ, Strongosky AJ, et al. Whole-Exome Sequencing as a Diagnostic Tool in a Family With Episodic Ataxia Type 1. *Mayo Clin Proc*. 2015;90:366–371.

Brownstein CA, Beggs AH, Rodan L, Shi J, Towne MC, Pelletier R, et al. Clinical heterogeneity associated with KCNA1 mutations include cataplexy and nonataxic presentations. *Neurogenetics*. 2016 Jan 1;17(1):11–6.

Mestre TA, Manole A, MacDonald H, et al. A novel KCNA1 mutation in a family with episodic ataxia and malignant hyperthermia. *Neurogenetics*. 2016;17:245–249.

Imbrici P, Altamura C, Gualandi F, et al. A novel KCNA1 mutation in a patient with paroxysmal ataxia, myokymia, painful contractures and metabolic dysfunctions. *Mol Cell Neurosci*. 2017;83:6–12.
